# Supplementary material for: Expression of ANRIL –Polycomb Complexes– CDKN2A/B/ARF Genes in Breast Tumors: Identification of a Two-Gene ( EZH2/CBX7 ) Signature with Independent Prognostic Value
Source: Oxford University Press journal article supplement (doi:10.1158/1541-7786.mcr-15-0418), 2016-04-21
Supplement: 15417786mcr150418-sup-156758_1_supp_data_3409878_r48v6m.docx [file 15417786mcr150418-sup-156758_1_supp_data_3409878_r48v6m.docx]

| **p14** | **p15** | **p16** |
| --- | --- | --- |
| 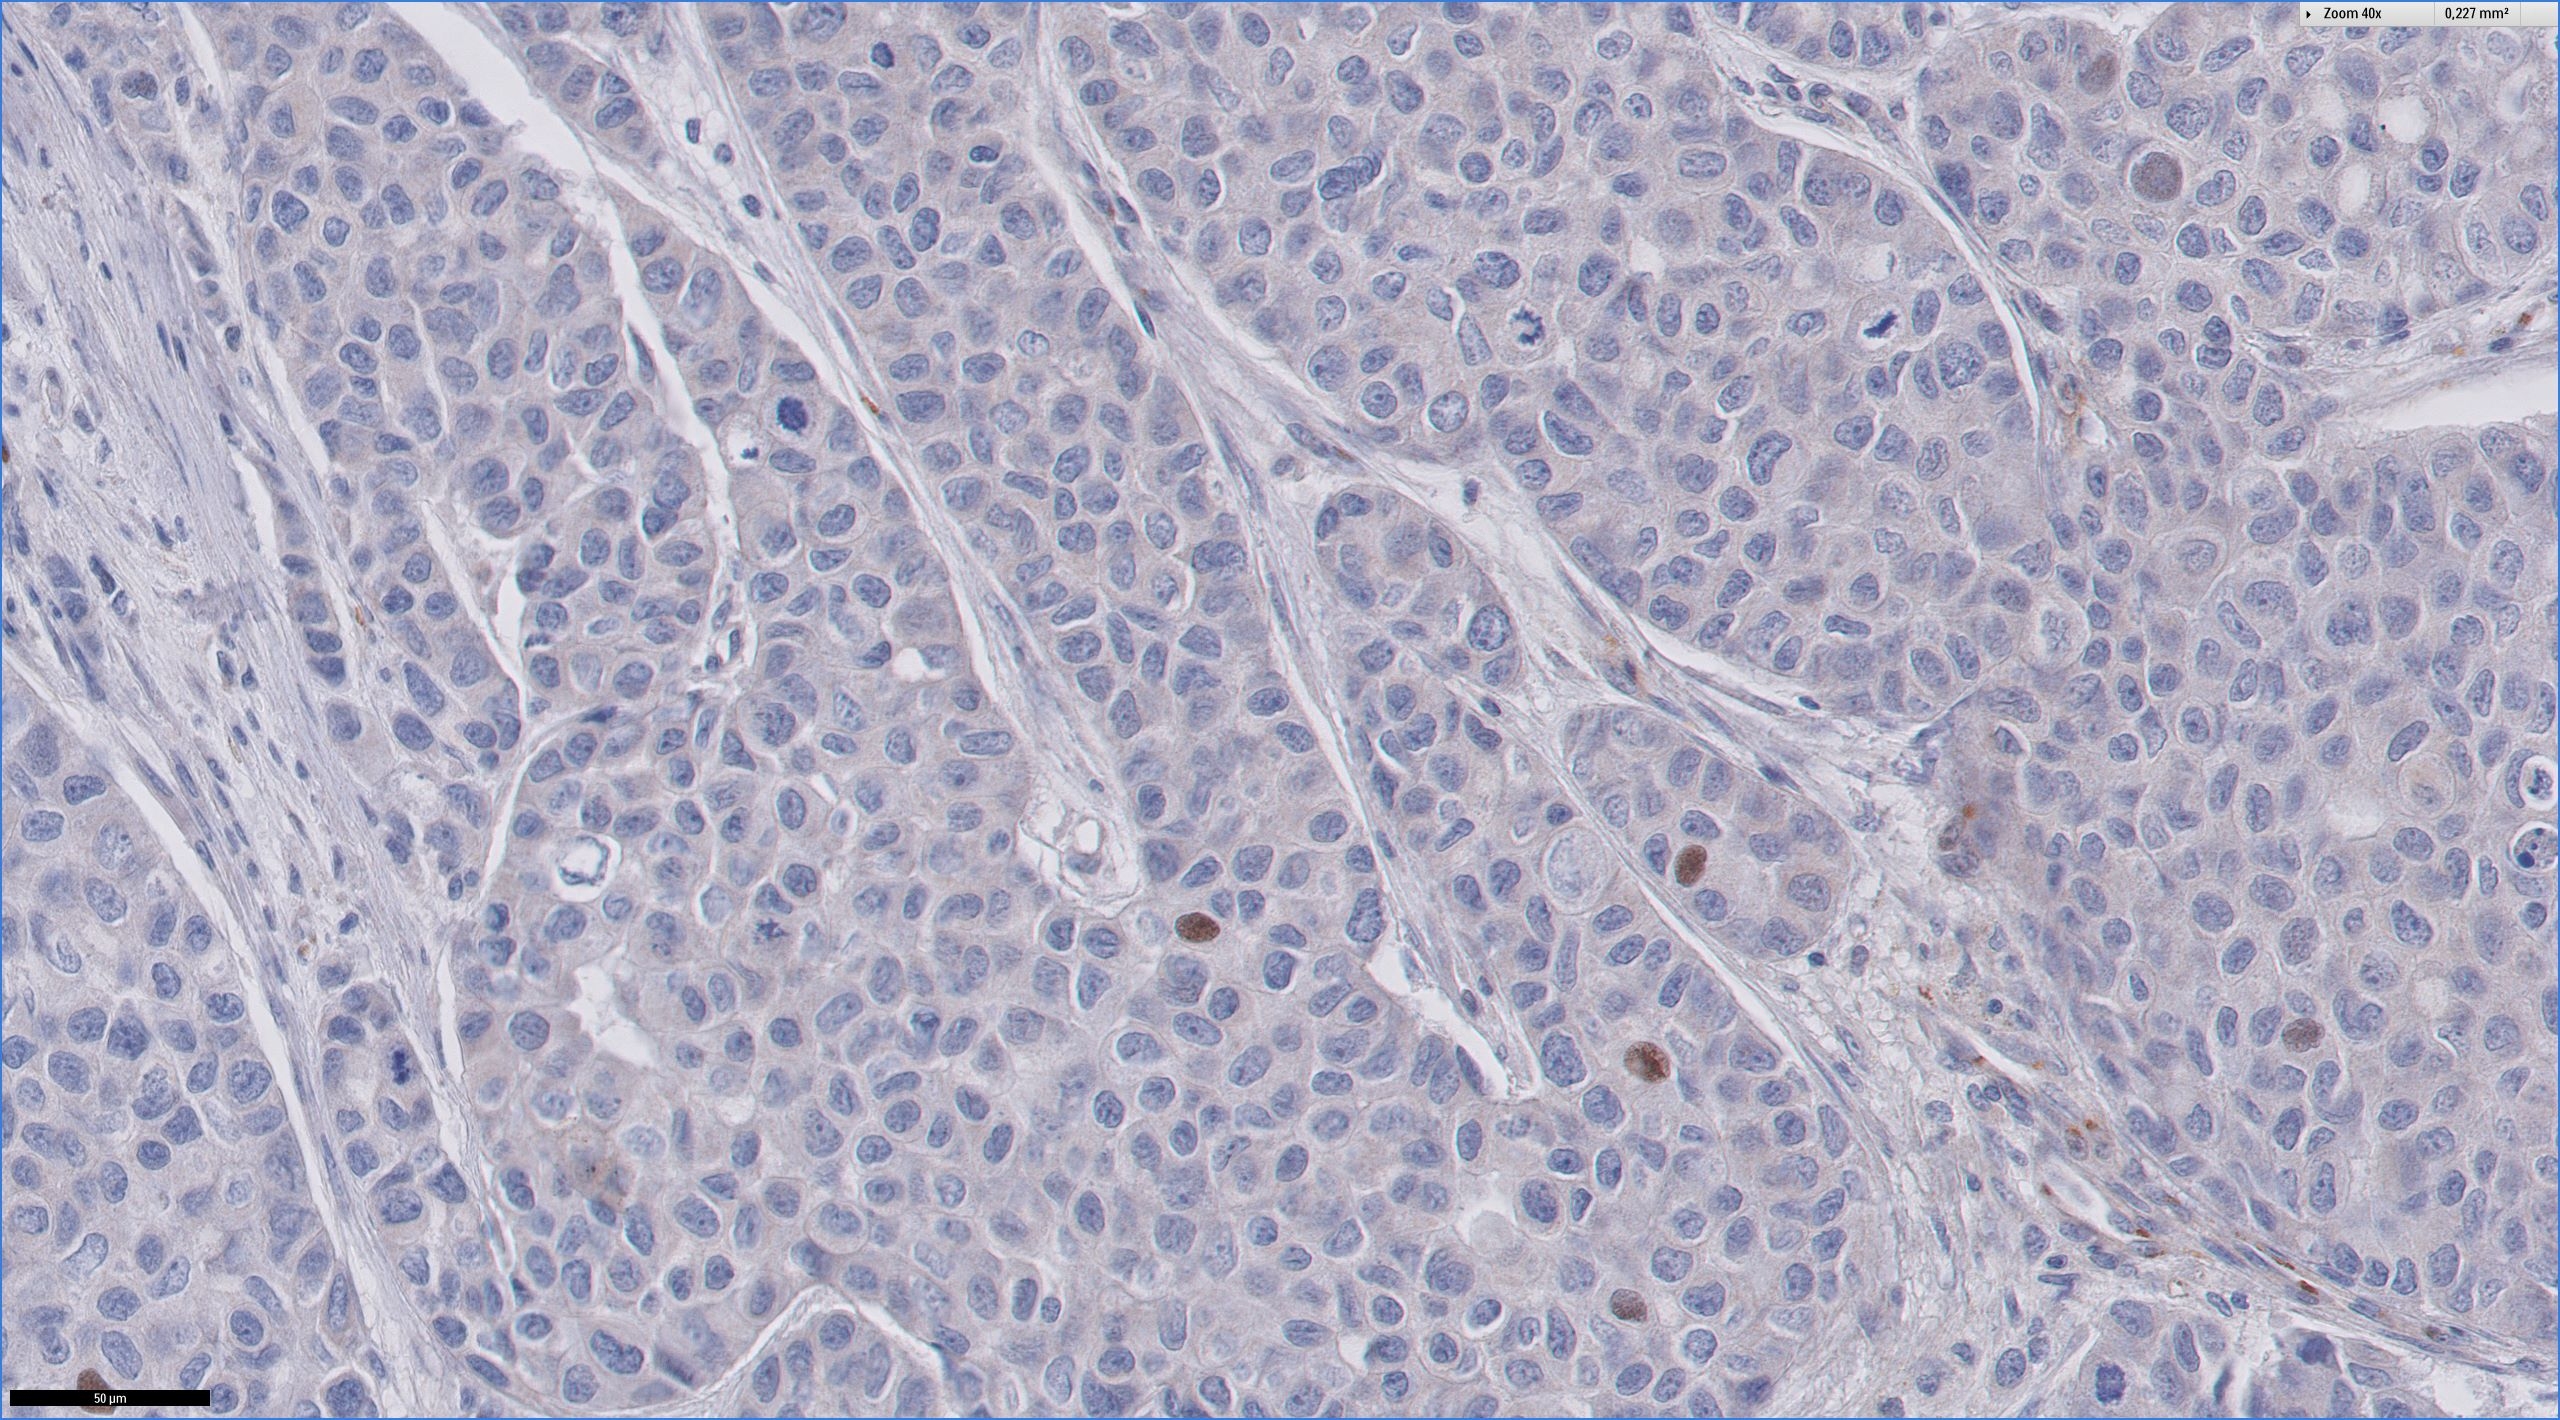  **X 200**  **Score 1** | 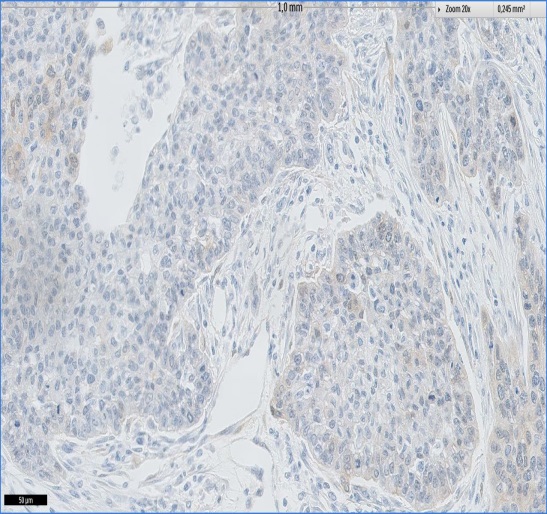  **X 200**  **Score 1** | 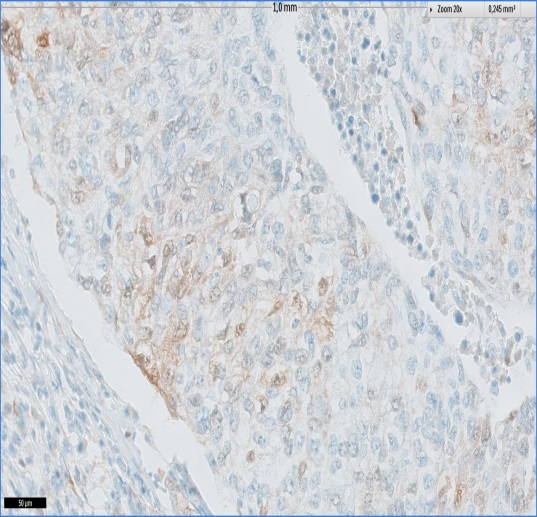  **X 400**  **Score 1** |
| 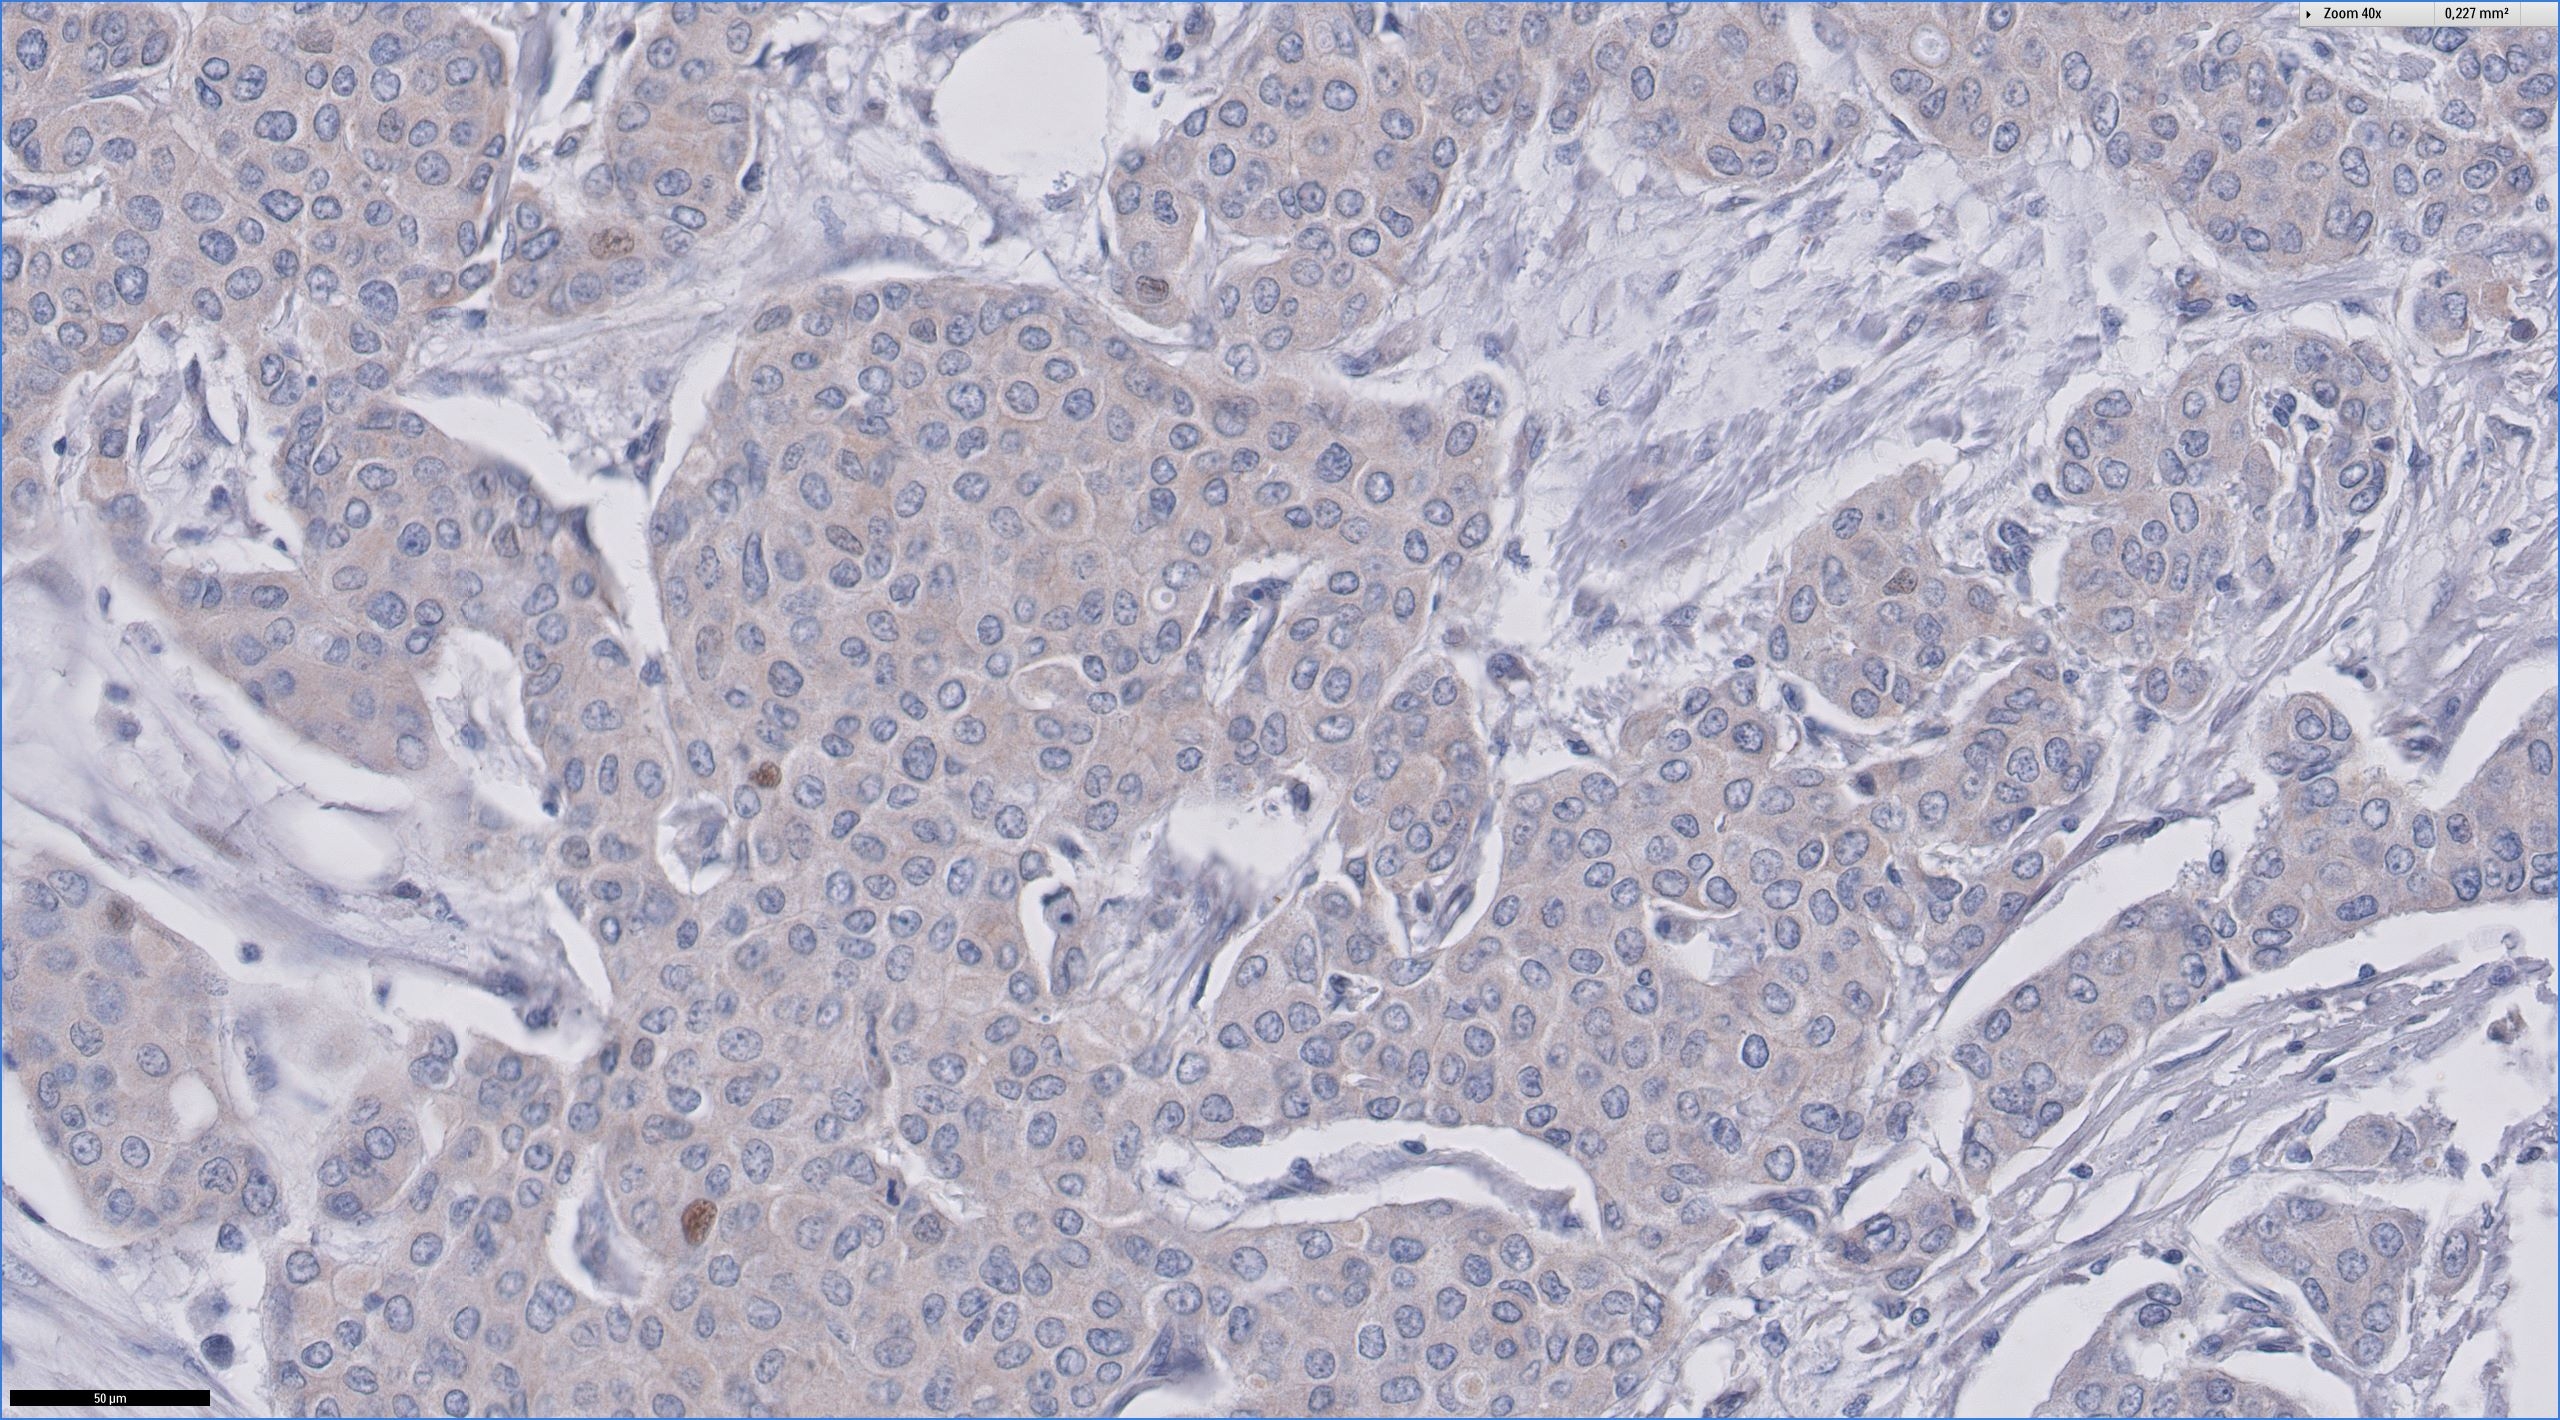  **X 200**  **Score 2** | 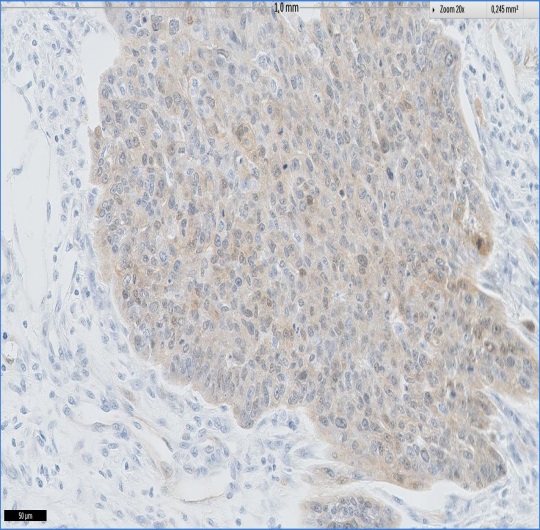  **X 200**  **Score 2** | 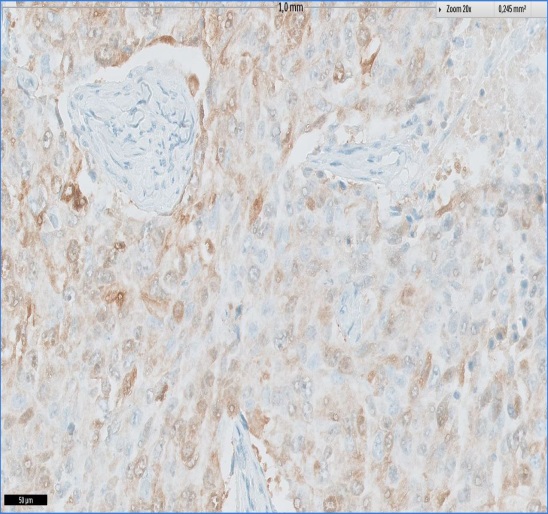  **X 400**  **Score 2** |
| 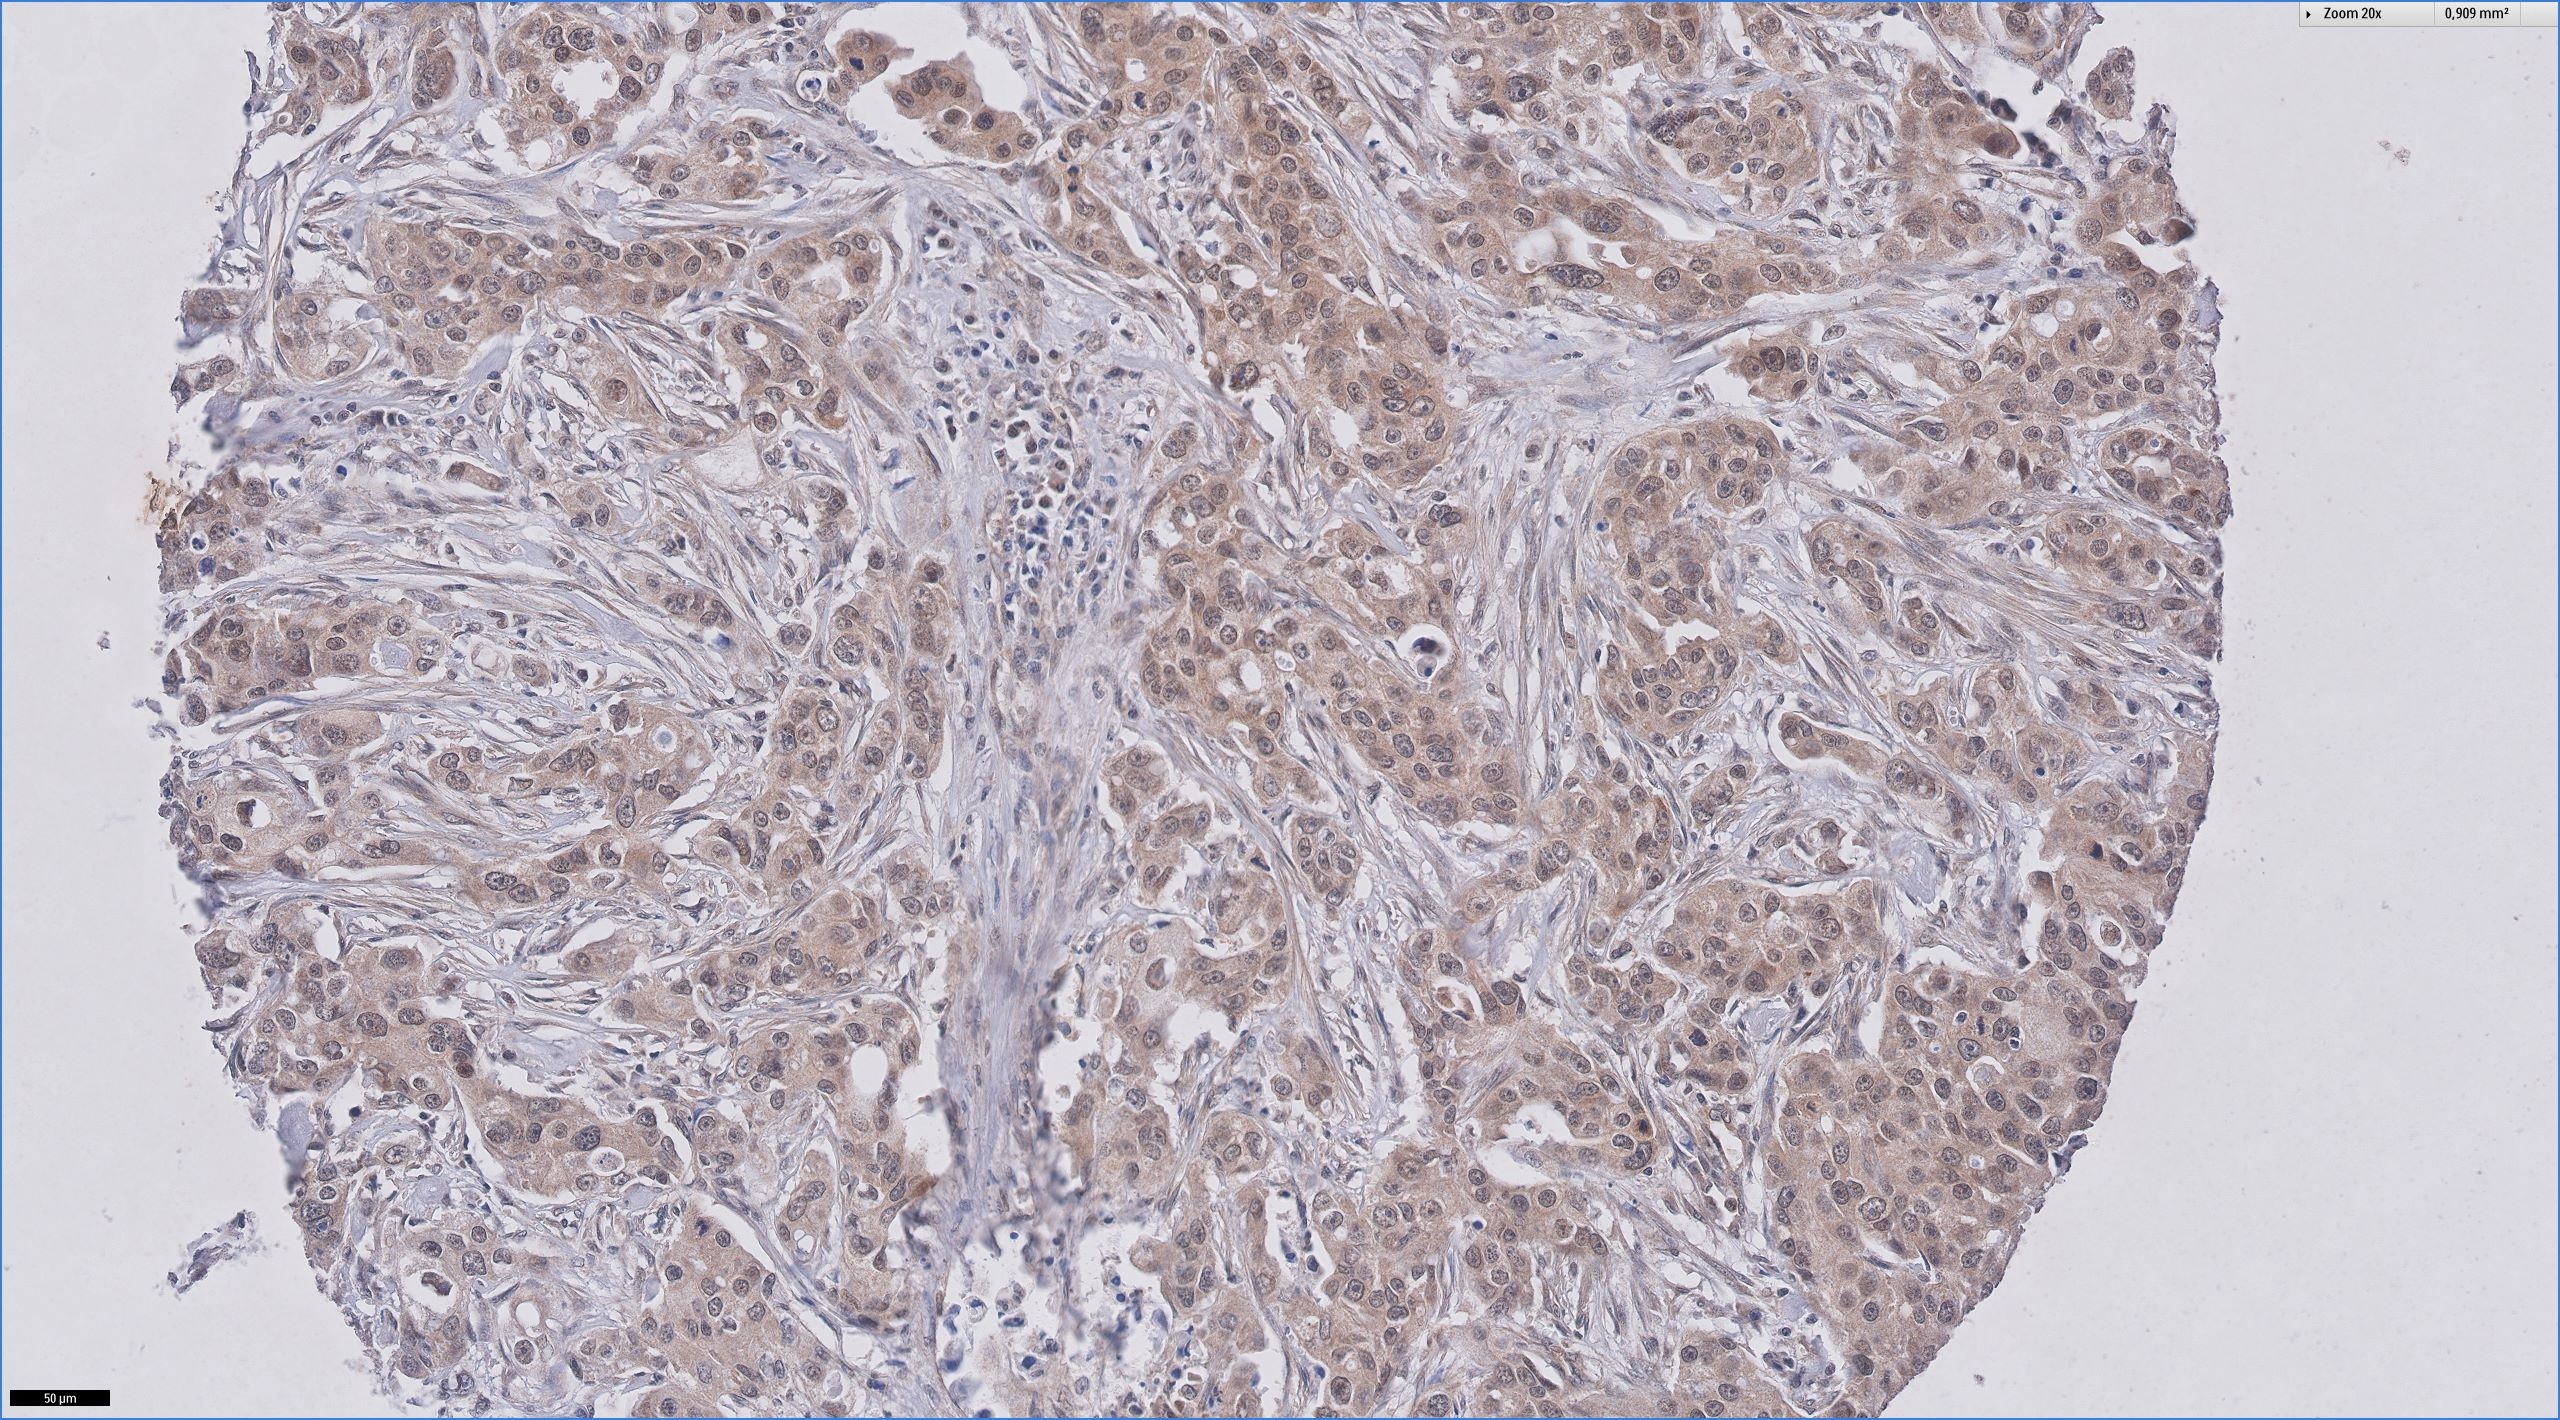  **X 200**  **Score 3** | 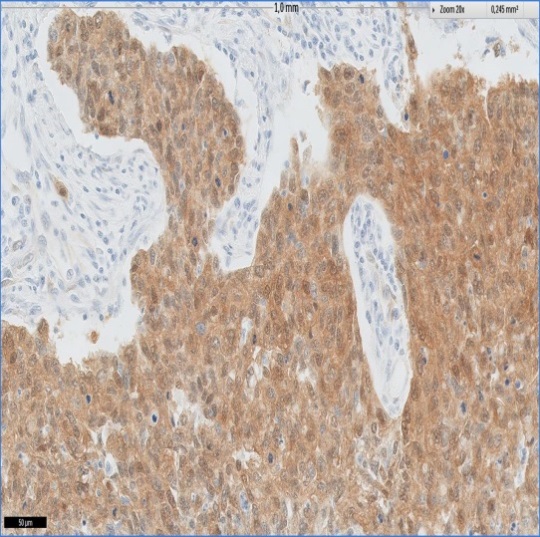  **X 400**  **Score 3** | 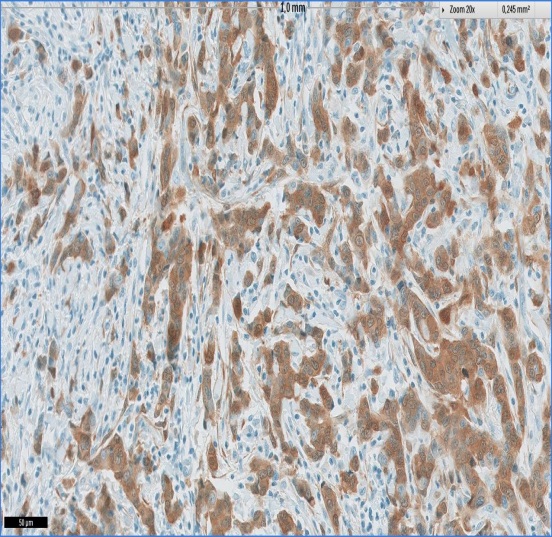  **X 100**  **Score 3** |

***Supplemental* *Figure 2: Meseure et al.***

**Figure 3, Meseure et al**
