# Supplementary material for: Expression of ANRIL –Polycomb Complexes– CDKN2A/B/ARF Genes in Breast Tumors: Identification of a Two-Gene ( EZH2/CBX7 ) Signature with Independent Prognostic Value
Source: Oxford University Press journal article supplement (doi:10.1158/1541-7786.mcr-15-0418), 2016-04-21
Supplement: 15417786mcr150418-sup-156758_1_supp_data_3409879_s48v6n.docx [file 15417786mcr150418-sup-156758_1_supp_data_3409879_s48v6n.docx]

**H3K27ac**

**H3K27me3**


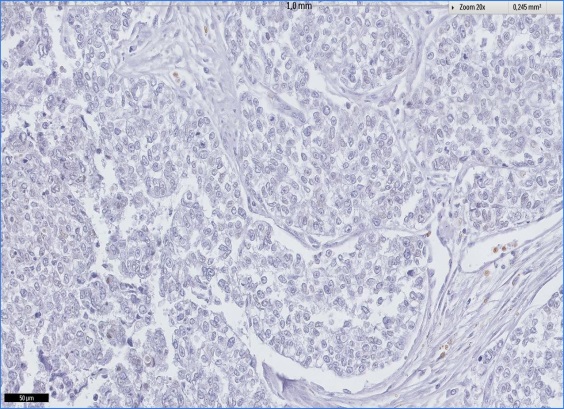

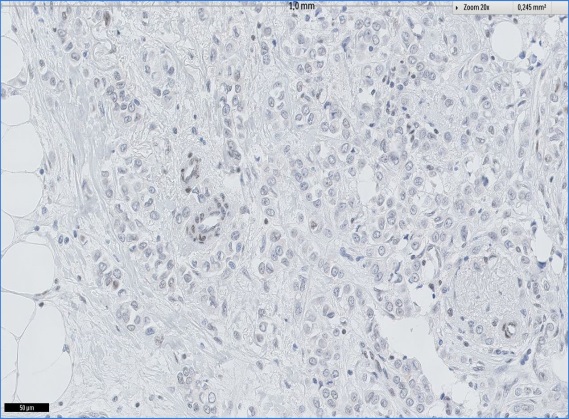


**X 200**

**X 200**

**Score 0**

**Score 0**


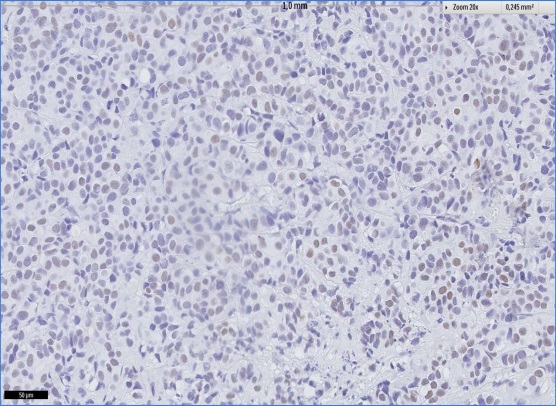

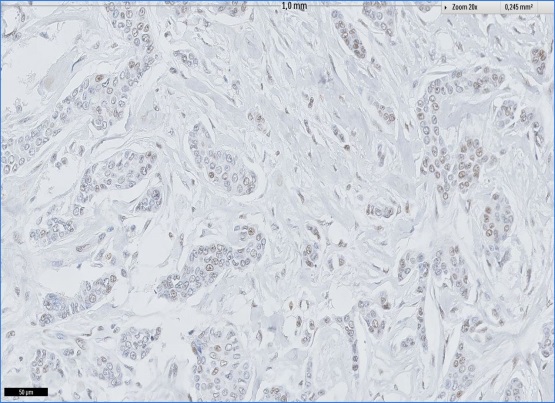


**X 100**

**X 200**

**Score 1**

**Score 1**


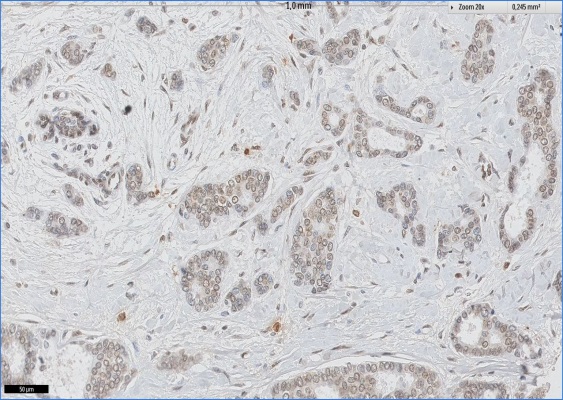

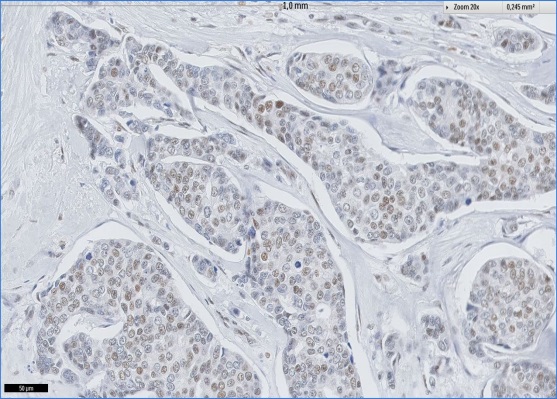


**X 200**

**X 200**

**Score 2**

**Score 2**


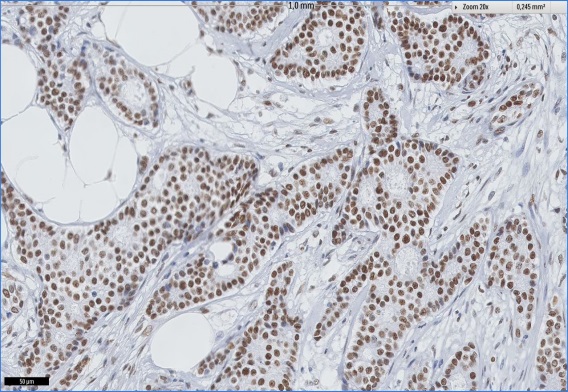

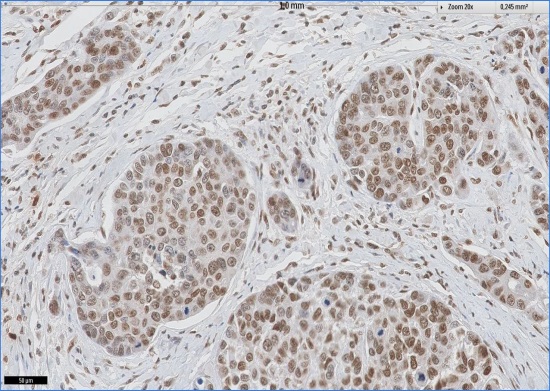


**X 200**

**X 200**

**Score 3**

**Score 3**

***Supplemental figure 3, Meseure et al***
