# Supplementary material for: Expression of ANRIL –Polycomb Complexes– CDKN2A/B/ARF Genes in Breast Tumors: Identification of a Two-Gene ( EZH2/CBX7 ) Signature with Independent Prognostic Value
Source: Oxford University Press journal article supplement (doi:10.1158/1541-7786.mcr-15-0418), 2016-04-21
Supplement: 15417786mcr150418-sup-156758_1_supp_data_3409885_y48v6n.doc [file 15417786mcr150418-sup-156758_1_supp_data_3409885_y48v6n.doc]

**Supplementary table 5: Relationship between *SUZ12* transcripts levels and classical clinical biological parameters in a series of 456 breast cancers.**

|  |  | Number of patients (%) | |  |
| --- | --- | --- | --- | --- |
|  | Total population (%) | *SUZ12* mRNA expression ≤3 relative to normals | *SUZ12* mRNA expression >3 relative to normals | *p*-valuea |
|  |  |  |  |  |
| *Total* | 456 (100.0) | 444 (97.4) | 12 (2.6) |  |
|  |  |  |  |  |
| *Age*  50  >50 | 98 (21.5)  358 (78.5) | 96 (21.6)  348 (78.4) | 2 (16.7)  10 (83.3) | 0.96 (NS) |
| *SBR histological grade* b, c  I  II  III | 58 (13)  229 (51.2)  160 (35.8) | 57 (13.1)  221 (50.8)  157 (36.1) | 1 (8.3)  8 (66.7)  3 (25) | 0.56 (NS) |
| *Lymph node status* d  0  1-3  >3 | 119 (26.1)  237 (52.1)  99 (21.8) | 112 (25.3)  234 (52.8)  97 (21.9) | 7 (58.3)  3 (25)  2 (16.7) | **<0.0000001** |
| *Macroscopic tumor size* e  25mm  >25mm | 223 (49.8)  225 (50.2) | 214 (49.1)  222 (50.9) | 9 (75)  3 (25) | 0.076 (NS) |
| *ERstatus*  Negative  Positive | 118 (25.9)  338 (74.1) | 117 (26.4)  327 (73.6) | 1 (8.3)  11 (91.7) | 0.28 (NS) |
| *PR status*  Negative  Positive | 194 (42.5)  262 (57.5) | 190 (42.8)  254 (57.2) | 4 (33.3)  8 (66.7) | 0.51 (NS) |
| *ERBB2 status*  Negative  Positive | 357 (78.3)  99 (21.7) | 350 (78.8)  94 (21.2) | 7 (58.3)  5 (41.7) | 0.18 (NS) |
| *Treatment*  No adjuvant  Chemotherapy  Hormonotherapy  Chemo and hormonotherapy | 87 (19.1)  91 (20.0)  176 (38.6)  102 (22.4) | 84 (96.6)  91 (100)  168 (95.5)  101 (99.0) | 3 (3.4)  0 (0)  8 (4.5)  1 (1.0) | 0.097 (NS) |

Abbreviations: ER: oestrogen receptor alpha; PR: progesterone receptor; ERBB2: human epidermal growth factor receptor 2; HR: hormone receptor. The bold values are statistically significant (*p*-value<0.05).

a 2Test; b Scarff Bloom Richardson classification; c Information available for 447 patients; d Information available for 455 patients; e Information available for 448 patients.
