# Supplementary material for: Expression of ANRIL –Polycomb Complexes– CDKN2A/B/ARF Genes in Breast Tumors: Identification of a Two-Gene ( EZH2/CBX7 ) Signature with Independent Prognostic Value
Source: Oxford University Press journal article supplement (doi:10.1158/1541-7786.mcr-15-0418), 2016-04-21
Supplement: 15417786mcr150418-sup-156758_1_supp_data_3409892_448v64.doc [file 15417786mcr150418-sup-156758_1_supp_data_3409892_448v64.doc]

**Supplementary table 12: Relationship between *P15* transcripts levels and classical clinical biological parameters in a series of 456 breast cancers.**

|  |  | Number of patients (%) | | |  |
| --- | --- | --- | --- | --- | --- |
|  | Total population (%) | *P15* mRNA expression <0.33 relative to normals | *P15* mRNA expression ≥0.33 and ≤3 relative to normals | *P15* mRNA expression >3 relative to normals | *p*-valuea |
|  |  |  |  |  |  |
| *Total* | 456 (100.0) | 32 (7) | 325 (71.3) | 99 (21.7) |  |
|  |  |  |  |  |  |
| *Age*  50  >50 | 98 (21.5)  358 (78.5) | 7 (21.9)  25 (78.1) | 71 (21.8)  254 (78.2) | 20 (20.2)  79 (79.8) | 0.94 (NS) |
| *SBR histological grade* b, c  I  II  III | 58 (13)  229 (51.2)  160 (35.8) | 8 (25)  15 (46.9)  9 (28.1) | 40 (12.6)  170 (53.6)  107 (33.8) | 10 (10.2)  44 (44.9)  44 (44.9) | 0.071 (NS) |
| *Lymph node status* d  0  1-3  >3 | 119 (26.1)  237 (52.1)  99 (21.8) | 9 (28.1)  15 (46.9)  8 (25) | 88 (27.1)  169 (52)  68 (20.9) | 22 (22.4)  53 (54.1)  23 (23.5) | 0.86 (NS) |
| *Macroscopic tumor size* e  25mm  >25mm | 223 (49.8)  225 (50.2) | 17 (54.8)  14 (45.2) | 158 (49.4)  162 (50.6) | 48 (49.5)  49 (50.5) | 0.84 (NS) |
| *ERstatus*  Negative  Positive | 118 (25.9)  338 (74.1) | 3 (9.4)  29 (90.6) | 80 (24.6)  245 (75.4) | 35 (35.4)  64 (64.6) | **0.0090** |
| *PR status*  Negative  Positive | 194 (42.5)  262 (57.5) | 6 (18.75)  26 (81.25) | 133 (40.9)  192 (59.1) | 55 (55.6)  44 (44.4) | **0.00080** |
| *ERBB2 status*  Negative  Positive | 357 (78.3)  99 (21.7) | 30 (93.75)  2 (6.25) | 249 (76.6)  76 (23.4) | 78 (78.8)  21 (21.2) | 0.078 (NS) |
| *Treatment*  No adjuvant  Chemotherapy  Hormonotherapy  Chemo and hormonotherapy | 87 (19.1)  91 (20.0)  176 (38.6)  102 (22.4) | 3 (3.5)  5 (5.5)  15 (8.5)  9 (8.8) | 69 (79.3)  66 (72.5)  123 (69.9)  67 (65.7) | 15 (17.2)  20 (22.0)  38 (21.6)  26 (25.5) | 0.46 (NS) |

Abbreviations: ER: oestrogen receptor alpha; PR: progesterone receptor; ERBB2: human epidermal growth factor receptor 2; HR: hormone receptor. The bold values are statistically significant (*p*-value<0.05).

a 2Test; b Scarff Bloom Richardson classification; c Information available for 447 patients; d Information available for 455 patients; e Information available for 448 patients.
