# Supplementary material for: Expression of ANRIL –Polycomb Complexes– CDKN2A/B/ARF Genes in Breast Tumors: Identification of a Two-Gene ( EZH2/CBX7 ) Signature with Independent Prognostic Value
Source: Oxford University Press journal article supplement (doi:10.1158/1541-7786.mcr-15-0418), 2016-04-21
Supplement: 15417786mcr150418-sup-156758_1_supp_data_3409893_k48v6k.xlsx [file 15417786mcr150418-sup-156758_1_supp_data_3409893_k48v6k.xlsx]

## Sheet: Feuil1
Supplemental Table 13: ANRIL pathway genes mRNA levels in the 4 breast tumor subtypes in the series of 456 breast tumors.
	Normal breast tissues	All tumors	Tumor subtypes
			HR-ERBB2-	HR-ERBB2+	HR+ERBB2-	HR+ERBB2+	p-value a
			(Group 1)	(Group 2)	(Group 3)	(Group 4)
	n=10	n=456	n=68	n=45	n=289	n=54
ANRIL	1.0 (0.25-2.45) b	1.58 (0.05-13.5)	1.92 (0.05-12.5)	1.35 (0.22-7.29)	1.50 (0.23-13.5)	1.91 (0.35-10.1)
Non overexpressed tumors (%)		366 (80.3)	42 (61.8)	40 (88.9)	244 (84.4)	40 (74.1)	0.00013
Overexpressed tumors (%)		90 (19.7)	26 (38.2)	5 (11.1)	45 (15.6)	14 (25.9)
EZH2	1.0 (0.48-2.32)	5.09 (0.76-48.3)	9.90 (0.95-45.8)	7.86 (2.68-35.6)	3.92 (0.76-48.3)	6.14 (1.00-17.6)
Non overexpressed tumors (%)		105 (23.0)	3 (4.4)	2 (4.4)	93 (32.2)	7 (13.0)	<0.0000001
Overexpressed tumors (%)		351 (77.0)	65 (95.6)	43 (95.6)	196 (67.8)	47 (87.0)
SUZ12	1.0 (0.56-1.25)	1.23 (0.43-59.2)	1.16 (0.43-6.74)	1.0 (0.49-2.98)	1.23 (0.46-59.2)	1.53 (0.48-5.00)
Non overexpressed tumors (%)		444 (97.4)	67 (98.5)	45 (100)	283 (97.9)	49 (90.7)	0.011
Overexpressed tumors (%)		12 (2.6)	1 (1.5)	0 (0)	6 (2.1)	5 (9.3)
EED c	1.0 (0.58-1.84)	1.21 (0.03-7.74)	1.48 (0.36-4.01)	1.31 (0.37-2.81)	1.13 (0.03-7.74)	1.22 (0.35-3.33)
Underexpressed tumors (%)		14 (3.1)	0 (0.0)	0 (0.0)	14 (4.9)	0 (0.0)	0.042
Non underexpressed tumors (%)		432 (96.9)	68 (100)	42 (100.0)	271 (95.1)	51 (100)
JARID2 d	1.0 (0.83-1.46)	1.37 (0.34-8.53)	1.47 (0.64-8.53)	1.76 (0.79-7.73)	1.29 (0.34-8.39)	1.62 (0.53-8.21)
Non overexpressed tumors (%)		431 (94.9)	63 (92.6)	36 (83.7)	282 (97.6)	50 (92.6)	0.00090
Overexpressed tumors (%)		23 (5.1)	5 (7.4)	7 (16.3)	7 (2.4)	4 (7.4)
BMI1	1.0 (0.59-1.47)	1.23 (0.00-14.0)	1.10 (0.38-6.56)	1.07 (0.49-4.49)	1.33 (0.00-14.0)	1.15 (0.15-4.85)
Non overexpressed tumors (%)		410 (89.9)	65 (95.6)	42 (93.3)	254 (87.9)	49 (90.7)	0.23 (NS)
Overexpressed tumors (%)		46 (10.1)	3 (4.4)	3 (6.7)	35 (12.1)	5 (9.3)
CBX7	1.0 (0.39-1.62)	0.38 (0.00-2.59)	0.31 (0.06-2.43)	0.25 (0.07-1.21)	0.42 (0.05-2.59)	0.35 (0.00-1.19)
Underexpressed tumors (%)		181 (39.7)	38 (55.9)	27 (60.0)	90 (31.1)	26 (48.1)	0.000020
Non underexpressed tumors (%)		275 (60.3)	30 (44.1)	18 (40.0)	199 (68.9)	28 (51.9)
ARF	1.0 (0.21-2.41)	2.28 (0.00-105)	10.7 (0.22-105)	2.80 (0.28-70.8)	1.76 (0.08-47.3)	2.29 (0.0-13.4)
Non overexpressed tumors (%)		274 (60.1)	18 (26.5)	25 (55.6)	197 (68.2)	34 (63.0)	<0.0000001
Overexpressed tumors (%)		182 (39.9)	50 (73.5)	20 (44.4)	92 (31.8)	20 (37.0)
P16 e	0.0 (0.0-6.95)	0.65 (0.0-63.4)	2.47 (0.0-63.4)	0.75 (0.0-8.18)	0.56 (0.0-15.2)	0.52 (0.0-18.5)
Non overexpressed tumors (%)		384 (84.2)	35 (51.5)	39 (86.7)	261 (90.3)	49 (90.7)	<0.0000001
Overexpressed tumors (%)		72 (15.8)	33 (48.5)	6 (13.3)	28 (9.7)	5 (9.3)
P15	1.0 (0.11-6.03)	1.62 (0.00-40.5)	1.65 (0.21-40.5)	1.67 (0.36-8.73)	1.60 (0.00-13.7)	1.66 (0.11-9.71)
Non overexpressed tumors (%)		357 (78.3)	44 (64.7)	35 (77.8)	235 (81.3)	43 (79.6)	0.029
Overexpressed tumors (%)		99 (21.7)	24 (35.3)	10 (22.2)	54 (18.7)	11 (20.4)
a Chi2 Test (comparison of percentage of under or overexpression in group 1 versus group 2 versus group 3 versus group 4).
b Median (range) of gene mRNA levels. The mRNA values of the samples were normalized such that the median of the 10 normal breast tissues mRNA values was 1.
c Data available in 446 samples.
d Data available in 454 samples.
e The mRNA values of the samples were normalized such that a Ct value of 35 was 1.
NS: not significant.
