# Supplementary material for: Expression of ANRIL –Polycomb Complexes– CDKN2A/B/ARF Genes in Breast Tumors: Identification of a Two-Gene ( EZH2/CBX7 ) Signature with Independent Prognostic Value
Source: Oxford University Press journal article supplement (doi:10.1158/1541-7786.mcr-15-0418), 2016-04-21
Supplement: 15417786mcr150418-sup-156758_1_supp_data_3409894_s48v6s.xlsx [file 15417786mcr150418-sup-156758_1_supp_data_3409894_s48v6s.xlsx]

## Sheet: Feuil1
Supplemental Table 14: Multivariate COX analysis of MFS for EZH2 and CBX7 combined expression levels in the series of 456 breast tumors.
Characteristics			HR a	95% CI b	p-value c
SBR histological grade	I		1		NS
	II		1.23	0.97-1.56
	III		1.51	0.94-2.42
Lymph node status	0		1		0.00021
	1-3		1.54	1.22-1.93
	>3		2.36	1.50-3.72
Macroscopic tumor size	<=25mm		1		0.014
	>25mm		1.50	1.09-2.08
EZH2 and CBX7	Normal EZH2 and CBX7 expression		1		0.001
combined expression levels	Normal EZH2 and under-CBX7		1.34	1.13-1.60
	Over-EZH2 and normal CBX7		1.80	1.27-2.56
	Over-EZH2 and under-CBX7		2.42	1.43-4.10
a Hazard ratio.
b 95% Confidential Interval.
c Multivariate COX analysis.
