# Supplementary material for: Expression of ANRIL –Polycomb Complexes– CDKN2A/B/ARF Genes in Breast Tumors: Identification of a Two-Gene ( EZH2/CBX7 ) Signature with Independent Prognostic Value
Source: Oxford University Press journal article supplement (doi:10.1158/1541-7786.mcr-15-0418), 2016-04-21
Supplement: 15417786mcr150418-sup-156758_1_supp_data_3409896_x48v6x.xls [file 15417786mcr150418-sup-156758_1_supp_data_3409896_x48v6x.xls]

## Sheet: CBX7 vs U44
Supplemental Table 16: Statistical analysis of EMT associated gene expressions relative to ANRIL expression level.
MicroRNAs	Breast cancer with low expression of ANRIL (n=30)	Breast cancer with high expression of ANRIL (n=30)	p-value a	ROC-AUC b
ANRIL	1,0 (0,22-3,56) c	11,5 (5,64-62,1) c	<0,0000001	1
EMT associated genes (n=9)
TWIST1	1,0 (0,24-6,34)	0,99 (0,13-7,97)	0,99 (NS)	0.501
ZEB1	1,0 (0,24-3,53)	1,19 (0,30-2,96)	0,55 (NS)	0.545
ZEB2	1,0 (0,39-3,89)	1,19 (0,44-3,53)	0,30 (NS)	0.578
SNAI1	1,0 (0,30-6,80)	1,17 (0,31-6,57)	0,38 (NS)	0.566
SNAI2	1,0 (0,39-3,16)	1,39 (0,23-4,97)	0,24 (NS)	0.588
VIM	1,0 (0,45-2,72)	1,09 (0,26-3,87)	0,50 (NS)	0.551
CDH2	1,0 (0,17-159)	1,24 (0,16-55,4)	0,47 (NS)	0.554
CDH1	1,0 (0,22-4,96)	0,99 (0,01-7,41)	0,63 (NS)	0.463
ZO-1	1,0 (0,40-3,80)	0,86 (0,23-4,07)	0,59 (NS)	0.46
a Kruskal et Wallis H Test.
b ROC (Receiver Operating Characteristics) - AUC (Area Under Curve) analysis.
b Median (range) of gene mRNA levels ; the mRNA values of the samples were normalized such that the median of the 30 breast cancer with low expression of ANRIL mRNA values was 1.
